# Supplementary material for: Effects of the PLK4 inhibitor Centrinone on the biological behaviors of acute myeloid leukemia cell lines
Source: Front Genet. 2022 Aug 16;13:898474. doi: 10.3389/fgene.2022.898474 (PMC9424683; doi:10.3389/fgene.2022.898474)
Supplement: Supplementary file 2 [file Table1.XLSX]

## Sheet: Sheet1
MOLM-13				OCI-AML3				KG-1
Centrinone (nM)	Cell viability (%)			Centrinone (nM)	Cell viability (%)			Centrinone (nM)	Cell viability (%)
0	100	100	100	0	100	100	100	0	100	100
50	58.22	50.0583	58.1034	50	70.983	61.8011	79.6351	50	88.2742	85.5682
100	21.3758	26.0439	30.2592	100	56.4451	60.3291	50.3273	100	62.8382	61.7558
200	18.1111	12.6805	9.9452	200	46.3803	50.0371	40.3714	200	49.4107	49.3902
400	19.878	10.7478	8.36222	400	38.7876	35.6093	43.0842	400	29.7588	25.1352
	MOLM-13			OCI-AML3			KG-1
Days		Inhibition (%)			Inhibition (%)			Inhibition (%)
0	0	0	0	0	0	0	0	0	0
1	15.619	10.8935	10.0895	13.6835	11.7444	11.1919	17.5007	7.99958	13.0006
2	21.3316	28.0157	28.1984	21.0653	12.3486	21.7917	19.1418	12.0609	20.1339
3	59.2535	68.1932	66.2171	64.9857	65.7655	69.7426	32.4304	37.7709	36.3778
4	58.8854	70.5414	65.9554	70.3957	64.6617	66.5435	63.4345	63.7064	66.2891
5	63.877	70.3743	67.6471	67.7784	71.1292	64.7426	69.522	63.2122	61.4914
		0nM			100nM			200nM
MOLM-13	1	0	3	0.892787	0.0376	3	0.608	0.03	3
OCI-AML3	1	0	3	0.859899	0.02893	3	0.735	0.0312099	3
KG-1	1	0	3	0.871722	0.023	3	0.557777	0.047212	3
		0nM			100nM			200nM
MOLM-13	3.02364	0.16	3	13.2787	0.376	3	27.8	1.23	3
OCI-AML3	8.66156	0.9	3	11.9899	0.893	3	31.5	0.912	3
KG-1	2.55294	0.897	3	7.17215	0.23	3	25.7777	0.956	3
MOLM-13		0nM			100nM			200nM
G1	48.23	49.85	47.14	21.65	20.57	21.1	20.78	19.61	21.36
S	35.93	35.07	35.15	25.84	25.76	25	26.12	24.38	26.28
G2/M	15.84	15.08	17.71	52.51	53.67	53.9	53.1	56.01	52.36
OCI-AML3		0nM			100nM			200nM
G1	49.36	47.28	49.15	47.15	45.82	46.02	47.53	46.81	45.04
S	26.23	28.55	26.64	23.91	25.1	24.68	23	23.43	25.18
G2/M	24.41	24.17	24.21	28.92	29.07	29.3	29.46	29.76	29.78
KG-1		0nM			100nM			200nM
G1	42.78	42.19	42.21	34.32	34.17	33.98	35.03	34.54	33.86
S	46.13	47.9	46.69	47.16	48.41	48.06	45.9	45.81	46.89
G2/M	11.1	9.41	11.3	18.53	17.42	17.96	19.07	19.66	19.26
		0nM			100nM			200nM
MOLM-13	100	0	3	48	3.76	3	14.9	2.79143	3
OCI-AML3	100	0	3	56.8	4.93	3	43.7	3.12	3
KG-1	100	0	3	45.3	3.3	3	23.3	5.256	3
OCI -AML3-sh-EGFP			OCI -AML3-sh-PLK4-1			OCI -AML3-sh-PLK4-2
1	0	3	0.451	0.1	3	0.237	0.056	3
Time（h）	OCI-AML3-sh-EGFP			OCI-AML3-sh-PLK4-1			OCI-AML3-sh-PLK4-2
0	0.016	0.014	0.015	0.015	0.013	0.011	0.015	0.0121	0.011
24	0.099999	0.106	0.093	0.062667	0.099667	0.077667	0.040667	0.066667	0.027667
48	0.255555	0.24	0.2699	0.221333	0.210333	0.230333	0.144333	0.174333	0.205333
72	0.562222	0.54	0.53	0.480667	0.436667	0.406667	0.373667	0.398667	0.361667
		0nM			100nM			200nM
MOLM-13	3.02364	0.16	3	13.2787	0.376	3	27.8	1.23	3
OCI-AML3	8.66156	0.9	3	11.9899	0.893	3	31.5	0.912	3
KG-1	2.55294	0.897	3	7.17215	0.23	3	25.7777	0.956	3
OCI -AML3-sh-EGFP			OCI -AML3-sh-PLK4-1			OCI-AML3-sh-PLK4-2
100	0	3	65.01	5.987	3	50	8.27	3
